# Supplementary material for: CINOEDV: a co-information based method for detecting and visualizing n-order epistatic interactions
Source: PubMed Central journal article supplement (PMC4869388; doi:10.1186/s12859-016-1076-8), 2016-05-17
Supplement: 12859_2016_1076_MOESM1_ESM.pdf [file 12859_2016_1076_MOESM1_ESM.pdf]

---

# CINOEDV: a co-information based method for detecting and visualizing $n$ -order epistatic interactions – Supplementary file

Junliang Shang<sup>1,2,\*</sup>, Yingxia Sun<sup>1</sup>, Jin-Xing Liu<sup>1</sup>, Junfeng Xia<sup>3</sup>, Junying Zhang<sup>4</sup>, Chun-Hou Zheng<sup>5</sup>

<sup>1</sup>School of Information Science and Engineering, Qufu Normal University, Rizhao 276826, China, <sup>2</sup>Institute of Network Computing, Qufu Normal University, Rizhao 276826, China, <sup>3</sup>Institute of Health Sciences, Anhui University, Hefei, Anhui 230601, China, <sup>4</sup>School of Computer Science and Technology, Xidian University, Xi'an 710071, China, <sup>5</sup>College of Electrical Engineering and Automation, Anhui University, Hefei, Anhui 230039, China

\*To whom correspondence should be addressed.

---

## NOTE 1. EVALUATION MEASURES (DETECTION POWER AND COMPUTATIONAL COMPLEXITY).

In the study, detection power and computational complexity are applied to evaluate the performance of CINOEDV.

Various forms of detection power have been proposed depending on what is desired to measure [1-9], and three types of them are introduced with constraints from conservative to modest.

Power1 is defined as the proportion of data sets in which all ground-truth SNPs are identified with no false positives where ground-truth SNPs refer to the causative SNPs that truly associated with the phenotype, in other words, the SNPs in models added into the simulation data sets. Power1 can be written as

$$\text{Power1} = \frac{1}{D} \sum_{i=1}^D x_i,$$

where  $D$  is the number of simulation data sets with the same parameter settings, and  $x_i \in \{0,1\}$  is the detection tag, i.e., if all ground-truth SNPs in data set  $i$  are detected with no false positives,  $x_i = 1$ , otherwise,  $x_i = 0$ . Though Power1 seems not practical since false positives are inevitable for any statistical tests and fewer false positives result in larger false negatives, we still introduce it because it is advantageous in practical applications, and might interest biologists due to false positives implying wasted experimental effort to validate the results.

Sometimes, allowing some small type-I error is more reasonable, thus Power2 and Power3 are introduced. Power2 and Power3 are defined as an average proportion of ground-truth SNPs in the top  $L_i$  detected SNPs, and can be respectively written as

$$\text{Power2} = \frac{1}{D} \sum_{i=1}^D \frac{y_i}{L_i},$$

$$\text{Power3} = \frac{1}{D} \sum_{i=1}^D \frac{z_i}{L_i},$$

where  $y_i$  and  $z_i$  are the numbers of ground-truth SNPs appearing in the top  $L_i$  SNPs identified in data set  $i$ . For Power2,  $L_i$  is equal to the number of ground-truth SNPs in data set  $i$ . For Power3,  $L_i$  is normally set to a value larger than that in Power2. In our experiments,  $L_i$  is set to 4.

Computational complexity is also considered. Running time in the same computational environment is measured to assess realistic applicability of compared methods.

Figure S1. GAIN RESULTS OF COMPARED DATA SETS.

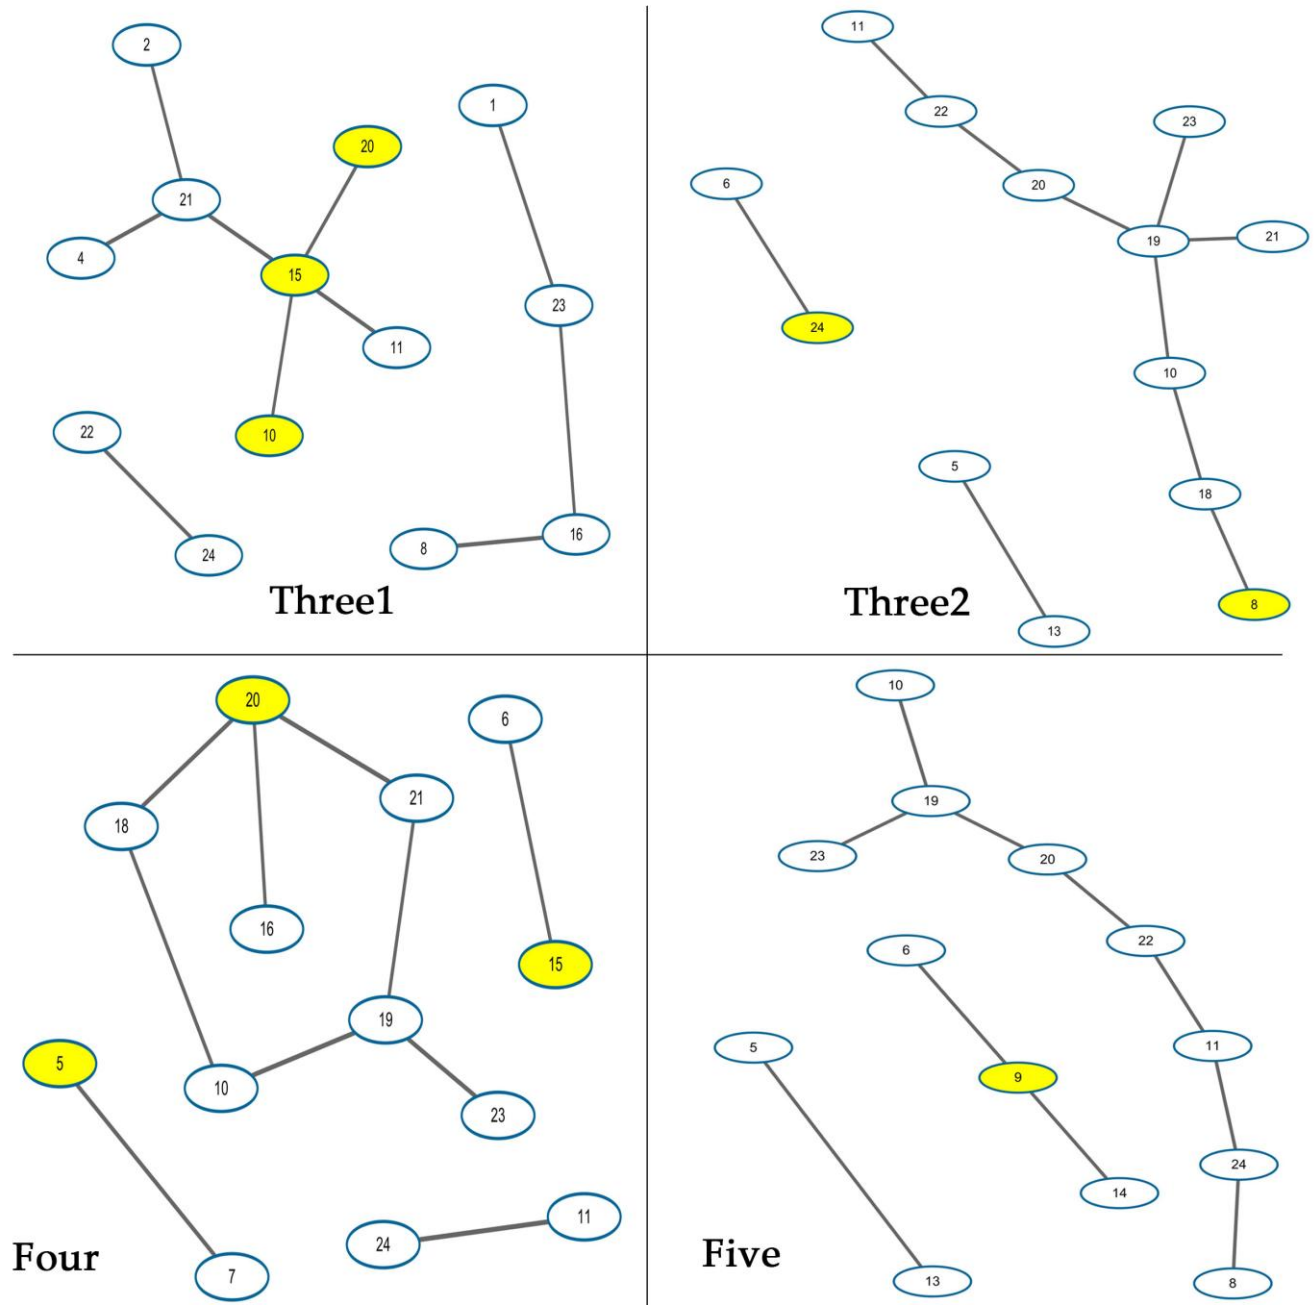

Figure S2. SEN RESULTS OF COMPARED DATA SETS.

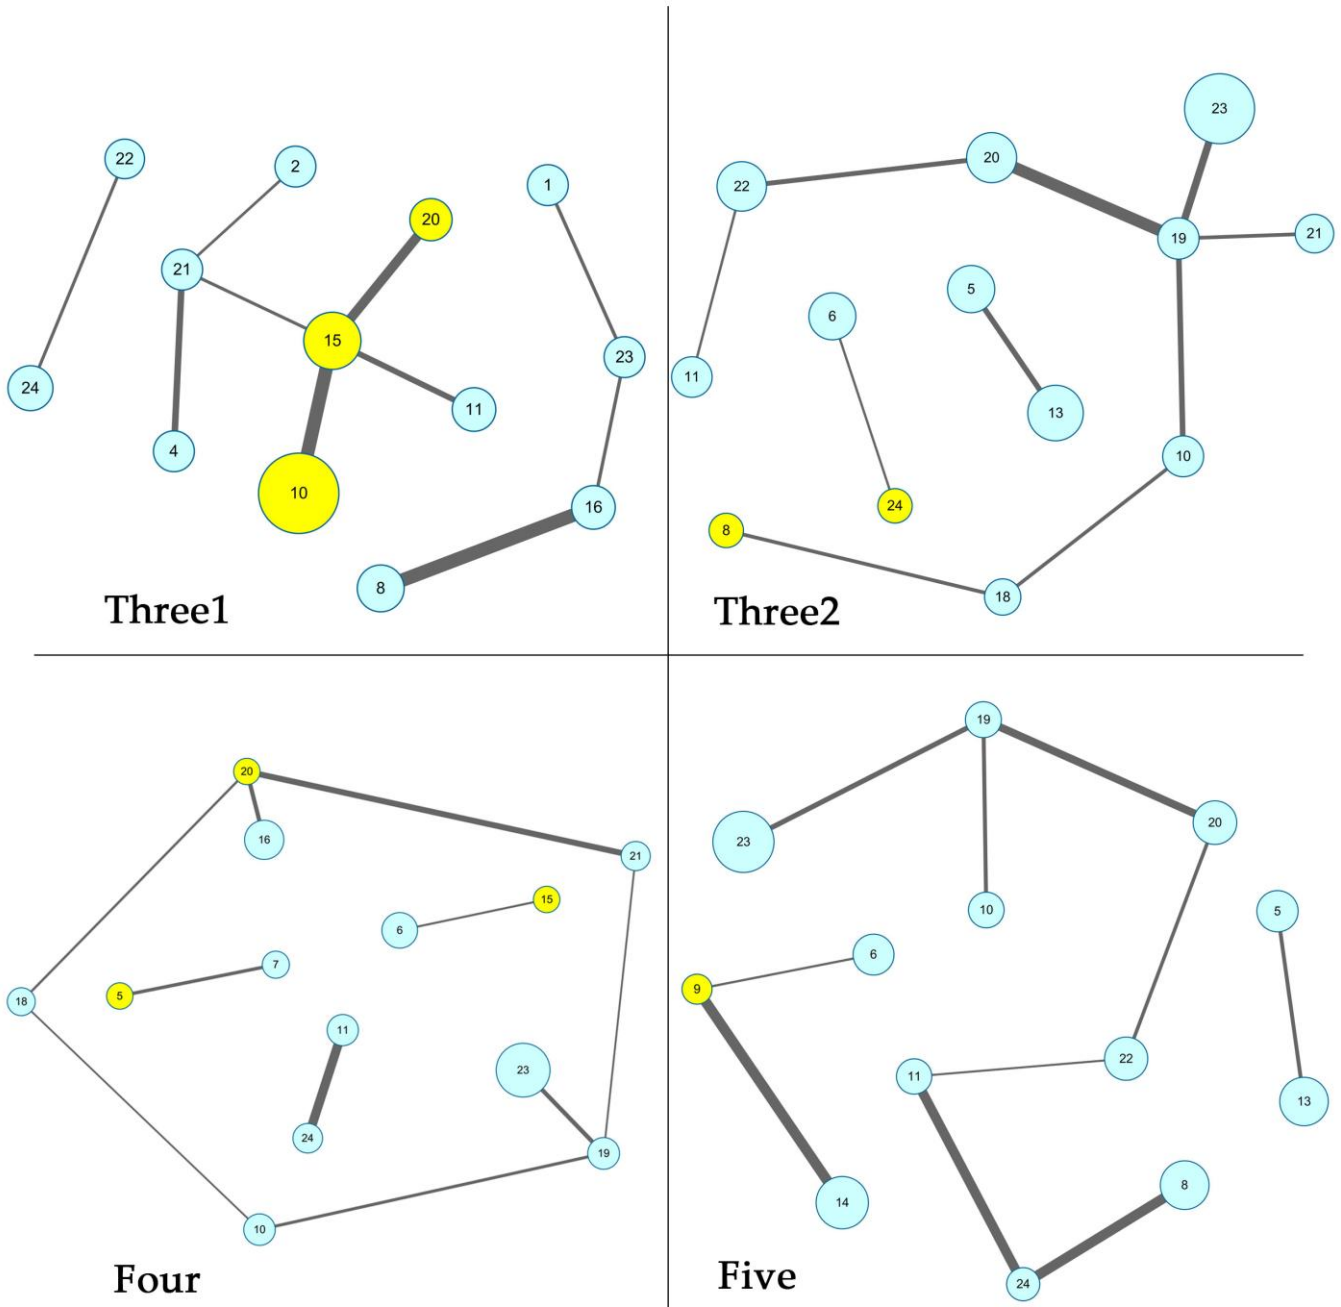

Figure S3. VISEN RESULTS OF COMPARED DATA SETS.

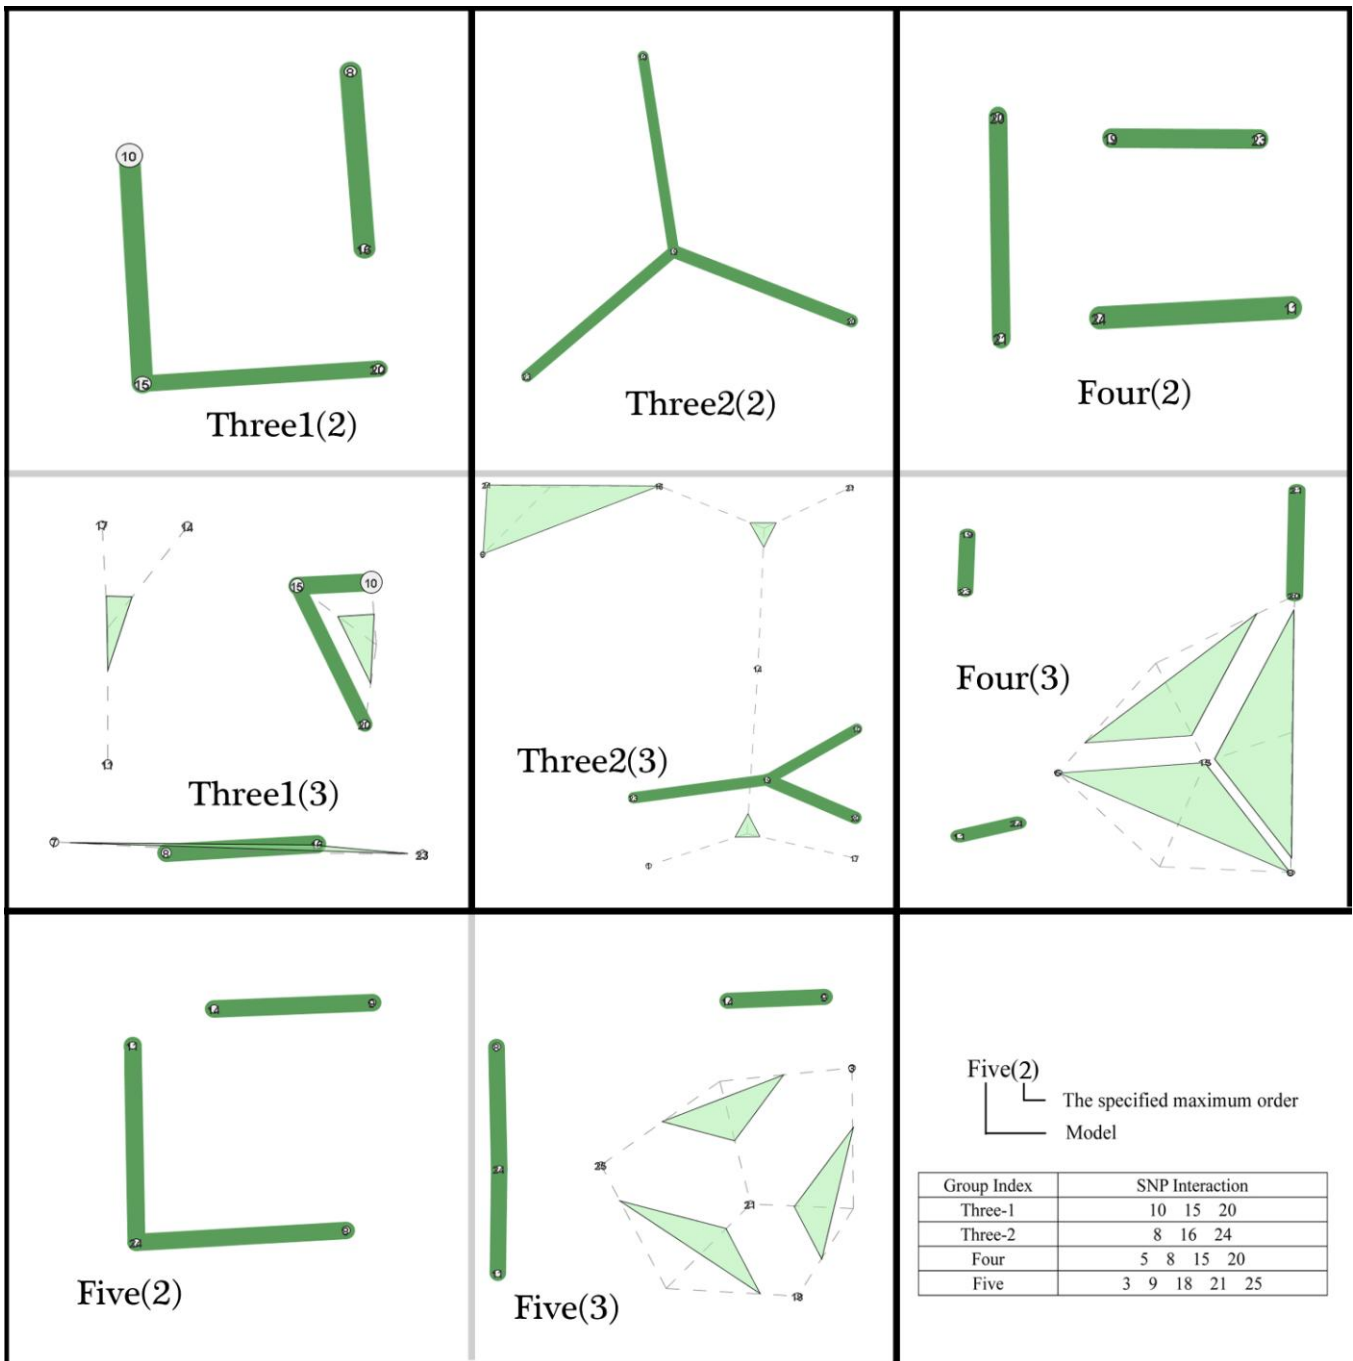

Figure S4. EINVIS RESULTS OF COMPARED DATA SETS.

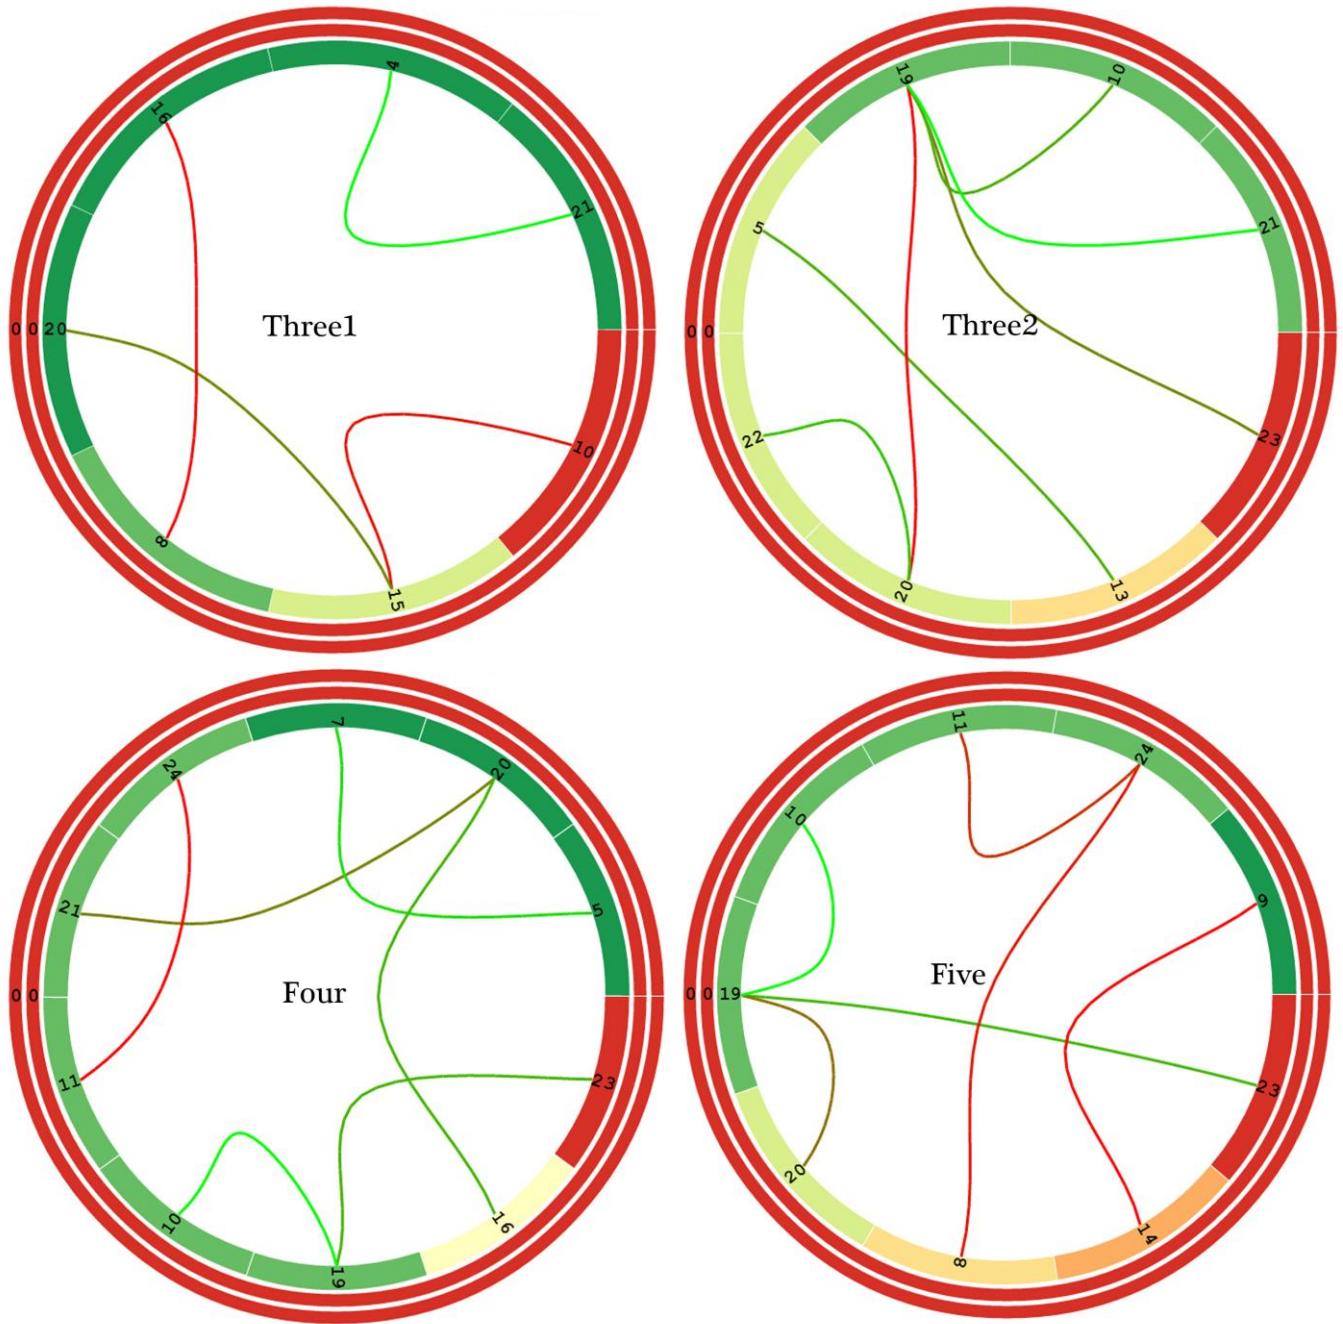

**Table S1. TOP 20 SNPS WITH HIGH MAIN EFFECTS.**

For the columns “Index” in Table S2, Table S3 and Table S4, bold and underlined numbers represent that their corresponding epistatic interactions are the top 20 ones with the high *CCI* values. For the columns “SNP” in Table S2, and “Epistatic Interactions” in Table S3 and Table S4, bold SNPs are those in the largest maximal connected subgraph of epistasis hypergraph Figure S1 of main paper, and underlined SNPs are those in the second largest maximal connected subgraph of epistasis hypergraph Figure S1 of main paper.

| Index | SNP              | Gene          | Chromosome | <i>NCI</i> Value |
|-------|------------------|---------------|------------|------------------|
| 1     | rs380390         | <i>CFH</i>    | Chr1       | 0.06472          |
| 2     | rs1329428        | <i>CFH</i>    | Chr1       | 0.05857          |
| 3     | rs3775652        | <i>INPP4B</i> | Chr4       | 0.05696          |
| 4     | rs1930022        | <i>N/A</i>    | Chr9       | 0.04858          |
| 5     | <b>rs1394608</b> | <i>SGCD</i>   | Chr5       | 0.04562          |
| 6     | rs725518         | <i>RRM1</i>   | Chr11      | 0.04496          |
| 7     | rs10511467       | <i>N/A</i>    | Chr9       | 0.04485          |
| 8     | rs1740752        | <i>N/A</i>    | Chr10      | 0.04434          |
| 9     | rs10507949       | <i>N/A</i>    | Chr13      | 0.04345          |
| 10    | <u>rs9294603</u> | <i>N/A</i>    | Chr6       | 0.04184          |
| 11    | rs6967345        | <i>N/A</i>    | Chr7       | 0.04181          |
| 12    | rs3913094        | <i>N/A</i>    | Chr12      | 0.04076          |
| 13    | <b>rs7006908</b> | <i>N/A</i>    | Chr8       | 0.04025          |
| 14    | rs10254116       | <i>BBS9</i>   | Chr7       | 0.04019          |
| 15    | rs3914244        | <i>N/A</i>    | Chr12      | 0.04018          |
| 16    | rs7104698        | <i>N/A</i>    | Chr11      | 0.03961          |
| 17    | rs10501439       | <i>TENM4</i>  | Chr11      | 0.03958          |
| 18    | rs7863587        | <i>N/A</i>    | Chr9       | 0.03882          |
| 19    | rs10512174       | <i>ISCA1</i>  | Chr9       | 0.03870          |
| 20    | rs1363688        | <i>N/A</i>    | Chr5       | 0.03867          |

**Table S2. TOP 20 EPISTATIC INTERACTIONS WITH HIGH 2-ORDER INTERACTION EFFECTS.**

For the columns “Index” in Table S2, Table S3 and Table S4, bold and underlined numbers represent that their corresponding epistatic interactions are the top 20 ones with the high *CCI* values. For the columns “SNP” in Table S2, and “Epistatic Interactions” in Table S3 and Table S4, bold SNPs are those in the largest maximal connected subgraph of epistasis hypergraph Figure S1 of main paper, and underlined SNPs are those in the second largest maximal connected subgraph of epistasis hypergraph Figure S1 of main paper.

| Index            | Epistatic Interaction                 | Gene                          | Chromosome     | <i>NCI</i> Value |
|------------------|---------------------------------------|-------------------------------|----------------|------------------|
| <u><b>1</b></u>  | <b>rs994542</b><br><b>rs9298846</b>   | <i>N/A</i><br><i>N/A</i>      | Chr6<br>Chr9   | 0.25762          |
| <u><b>2</b></u>  | rs2359907<br>rs9326913                | <i>N/A</i><br><i>N/A</i>      | Chr1<br>Chr5   | 0.22561          |
| <u><b>3</b></u>  | rs2957935<br>rs10519745               | <i>SKAP1</i><br><i>N/A</i>    | Chr17<br>Chr5  | 0.22267          |
| <u><b>4</b></u>  | rs10231824<br>rs571361                | <i>PLXNA4</i><br><i>N/A</i>   | Chr7<br>Chr1   | 0.20243          |
| <u><b>5</b></u>  | rs4856145<br>rs3828057                | <i>N/A</i><br><i>RORC</i>     | Chr3<br>Chr1   | 0.19749          |
| <u><b>6</b></u>  | rs1436532<br>rs10507601               | <i>N/A</i><br><i>N/A</i>      | Chr4<br>Chr13  | 0.19140          |
| <u><b>7</b></u>  | rs305728<br>rs10497071                | <i>N/A</i><br><i>N/A</i>      | Chr5<br>Chr2   | 0.19057          |
| <u><b>8</b></u>  | <b>rs2298809</b><br><b>rs7688514</b>  | <i>N/A</i><br><i>VEGFC</i>    | Chr11<br>Chr4  | 0.18960          |
| <u><b>9</b></u>  | <b>rs2278031</b><br><b>rs446815</b>   | <i>APIG1</i><br><i>N/A</i>    | Chr16<br>Chr11 | 0.18154          |
| <u><b>10</b></u> | rs756308<br>rs2011542                 | <i>N/A</i><br><i>N/A</i>      | Chr10<br>Chr7  | 0.18122          |
| <u><b>11</b></u> | rs10516495<br>rs2011542               | <i>SLC9B1</i><br><i>N/A</i>   | Chr4<br>Chr7   | 0.18122          |
| <u><b>12</b></u> | rs339884<br>rs195937                  | <i>N/A</i><br><i>N/A</i>      | Chr18<br>Chr4  | 0.18119          |
| <u><b>13</b></u> | <b>rs1408120</b><br><b>rs10506115</b> | <i>PTPRD</i><br><i>N/A</i>    | Chr9<br>Chr12  | 0.17685          |
| <u><b>14</b></u> | rs595113<br>rs9300104                 | <i>N/A</i><br><i>RNF141</i>   | Chr1<br>Chr11  | 0.16972          |
| <u><b>15</b></u> | <b>rs10518739</b><br><b>rs931210</b>  | <i>MAP2K5</i><br><i>N/A</i>   | Chr15<br>Chr5  | 0.16603          |
| <u><b>16</b></u> | <b>rs2386906</b><br><b>rs9313446</b>  | <i>N/A</i><br><i>SLIT3</i>    | Chr10<br>Chr5  | 0.16543          |
| <u><b>17</b></u> | <b>rs9313446</b><br><b>rs293379</b>   | <i>SLIT3</i><br><i>ABHD2</i>  | Chr5<br>Chr15  | 0.16349          |
| 18               | rs1458402<br>rs4901408                | <i>N/A</i><br><i>N/A</i>      | Chr6<br>Chr14  | 0.15851          |
| 19               | rs6483628<br>rs10504003               | <i>NAV2</i><br><i>N/A</i>     | Chr11<br>Chr8  | 0.15589          |
| 20               | <b>rs3844556</b><br><b>rs10521129</b> | <i>PKD2L1</i><br><i>ZZEF1</i> | Chr10<br>Chr17 | 0.15405          |

**Table S3. TOP 20 EPISTATIC INTERACTIONS WITH HIGH 3-ORDER INTERACTION EFFECTS.**

For the columns “Index” in Table S2, Table S3 and Table S4, bold and underlined numbers represent that their corresponding epistatic interactions are the top 20 ones with the high *CCI* values. For the columns “SNP” in Table S2, and “Epistatic Interactions” in Table S3 and Table S4, bold SNPs are those in the largest maximal connected subgraph of epistasis hypergraph Figure S1 of main paper, and underlined SNPs are those in the second largest maximal connected subgraph of epistasis hypergraph Figure S1 of main paper.

| Index           | Epistatic Interaction | Gene           | Chromosome | <i>NCI</i> Value |
|-----------------|-----------------------|----------------|------------|------------------|
| <b><u>1</u></b> | <b>rs4723261</b>      | <i>PTHB1</i>   | Chr7       | 0.17507          |
|                 | <b>rs1036995</b>      | <i>PCDH9</i>   | Chr13      |                  |
|                 | <b>rs2298809</b>      | <i>N/A</i>     | Chr11      |                  |
| <b><u>2</u></b> | rs595113              | <i>N/A</i>     | Chr1       | 0.16096          |
|                 | <u>rs2031175</u>      | <i>ANKRD15</i> | Chr9       |                  |
|                 | <u>rs9300104</u>      | <i>RNF141</i>  | Chr11      |                  |
| <b><u>3</u></b> | rs10517546            | <i>N/A</i>     | Chr4       | 0.15934          |
|                 | rs10500875            | <i>N/A</i>     | Chr11      |                  |
|                 | rs10505107            | <i>ANGPT1</i>  | Chr8       |                  |
| 4               | <b>rs2386906</b>      | <i>N/A</i>     | Chr10      | 0.14875          |
|                 | <b>rs1476623</b>      | <i>NXPH1</i>   | Chr7       |                  |
|                 | <b>rs10518739</b>     | <i>MAP2K5</i>  | Chr15      |                  |
| 5               | <b>rs293379</b>       | <i>ABHD2</i>   | Chr15      | 0.14681          |
|                 | <b>rs1476623</b>      | <i>NXPH1</i>   | Chr7       |                  |
|                 | <b>rs10518739</b>     | <i>MAP2K5</i>  | Chr15      |                  |
| 6               | <u>rs1436532</u>      | <i>N/A</i>     | Chr4       | 0.14445          |
|                 | <u>rs9294603</u>      | <i>N/A</i>     | Chr6       |                  |
|                 | <u>rs595113</u>       | <i>N/A</i>     | Chr1       |                  |
| 7               | <b>rs1394608</b>      | <i>SGCD</i>    | Chr5       | 0.14439          |
|                 | <b>rs9323782</b>      | <i>N/A</i>     | Chr14      |                  |
|                 | <b>rs931210</b>       | <i>N/A</i>     | Chr5       |                  |
| 8               | <u>rs1374431</u>      | <i>N/A</i>     | Chr2       | 0.14414          |
|                 | <u>rs1436532</u>      | <i>N/A</i>     | Chr4       |                  |
|                 | <u>rs1978419</u>      | <i>N/A</i>     | Chr5       |                  |
| 9               | rs3922799             | <i>N/A</i>     | Chr2       | 0.13967          |
|                 | rs10517546            | <i>N/A</i>     | Chr4       |                  |
|                 | rs10500875            | <i>N/A</i>     | Chr11      |                  |
| 10              | <b>rs994542</b>       | <i>N/A</i>     | Chr6       | 0.13863          |
|                 | <b>rs3781868</b>      | <i>NPAT</i>    | Chr11      |                  |
|                 | <b>rs2207768</b>      | <i>NRG3</i>    | Chr10      |                  |
| 11              | <b>rs1394608</b>      | <i>SGCD</i>    | Chr5       | 0.13813          |
|                 | <b>rs1408120</b>      | <i>PTPRD</i>   | Chr9       |                  |
|                 | <b>rs10495668</b>     | <i>SMC6</i>    | Chr2       |                  |
| 12              | <b>rs1926489</b>      | <i>GPC5</i>    | Chr13      | 0.13730          |
|                 | <b>rs1408120</b>      | <i>PTPRD</i>   | Chr9       |                  |
|                 | <b>rs718309</b>       | <i>PCDH15</i>  | Chr10      |                  |
| 13              | <u>rs10486519</u>     | <i>PTHB1</i>   | Chr7       | 0.13669          |
|                 | <u>rs1978419</u>      | <i>N/A</i>     | Chr5       |                  |
|                 | <u>rs10507601</u>     | <i>N/A</i>     | Chr13      |                  |
| 14              | <b>rs7006908</b>      | <i>N/A</i>     | Chr8       | 0.13636          |
|                 | <b>rs10518739</b>     | <i>MAP2K5</i>  | Chr15      |                  |
|                 | <b>rs10495668</b>     | <i>SMC6</i>    | Chr2       |                  |
| 15              | <b>rs293379</b>       | <i>ABHD2</i>   | Chr15      | 0.13526          |
|                 | <b>rs9287251</b>      | <i>RGS7</i>    | Chr1       |                  |
|                 | <b>rs446815</b>       | <i>N/A</i>     | Chr11      |                  |
| 16              | <b>rs2182277</b>      | <i>N/A</i>     | Chr6       | 0.13441          |
|                 | <b>rs1036995</b>      | <i>PCDH9</i>   | Chr13      |                  |



|    |                  |               |       |         |
|----|------------------|---------------|-------|---------|
|    | <b>rs2207768</b> | <i>NRG3</i>   | Chr10 |         |
|    | <b>rs3844556</b> | <i>PKD2L1</i> | Chr10 |         |
| 17 | <b>rs1036995</b> | <i>PCDH9</i>  | Chr13 | 0.13419 |
|    | <b>rs4880042</b> | <i>PAX5</i>   | Chr9  |         |
|    | <b>rs2386906</b> | <i>N/A</i>    | Chr10 |         |
| 18 | <b>rs9287251</b> | <i>RGS7</i>   | Chr1  | 0.13324 |
|    | <b>rs446815</b>  | <i>N/A</i>    | Chr11 |         |
|    | <b>rs3743175</b> | <i>ZNF291</i> | Chr15 |         |
| 19 | <b>rs9323782</b> | <i>N/A</i>    | Chr14 | 0.13317 |
|    | <b>rs4880042</b> | <i>PAX5</i>   | Chr9  |         |
|    | <b>rs2828155</b> | <i>N/A</i>    | Chr21 |         |
| 20 | <b>rs9323782</b> | <i>N/A</i>    | Chr14 | 0.13317 |
|    | <b>rs4880042</b> | <i>PAX5</i>   | Chr9  |         |

**Table S4. DETECTED SNPS AND EPISTATIC INTERACTIONS OF OTHER COMPETING METHODS.**

In the table, p-values are calculated by the *chi*-squared test. *N/A* means no gene being available. Detected SNPs and epistatic interactions of both BEAM and *epi*MODE are directly cited from their respective papers.

| Method          | SNP (Epistatic Interaction) | P-value   | Gene             | Chromosome |
|-----------------|-----------------------------|-----------|------------------|------------|
| SNPRuler        | rs10499664                  | 1.099e-05 | <i>N/A</i>       | Chr7       |
|                 | rs10510608                  |           | <i>MGC61571</i>  | Chr3       |
|                 | rs10493240                  | 3.117e-05 | <i>N/A</i>       | Chr1       |
|                 | rs10512484                  |           | <i>N/A</i>       | Chr17      |
|                 | rs10485289                  | 3.535e-05 | <i>N/A</i>       | Chr6       |
|                 | rs10513713                  |           | <i>N/A</i>       | Chr3       |
|                 | rs727113                    | 4.038e-05 | <i>N/A</i>       | Chr13      |
|                 | rs9284239                   |           | <i>N/A</i>       | Chr13      |
|                 | rs1331977                   | 4.461e-05 | <i>APBA1</i>     | Chr9       |
|                 | rs10506115                  |           | <i>N/A</i>       | Chr12      |
|                 | rs2135488                   | 4.468e-05 | <i>N/A</i>       | Chr13      |
|                 | rs6772323                   |           | <i>KCNAB1</i>    | Chr3       |
|                 | rs727922                    | 9.632e-05 | <i>CAMK4</i>     | Chr5       |
|                 | rs2549513                   |           | <i>N/A</i>       | Chr16      |
|                 | rs4674305                   | 1.013e-04 | <i>VILI</i>      | Chr2       |
|                 | rs10513027                  |           | <i>N/A</i>       | Chr5       |
|                 | rs3798425                   | 1.750e-04 | <i>MYO6</i>      | Chr6       |
|                 | rs692897                    |           | <i>COP1</i>      | Chr11      |
|                 | rs10487321                  | 2.066e-04 | <i>N/A</i>       | Chr7       |
|                 | rs1331977                   |           | <i>APBA1</i>     | Chr9       |
|                 | <b>rs380390</b>             | 1.752e-06 | <i>CFH</i>       | Chr1       |
|                 | rs10511901                  | 6.829e-04 | <i>N/A</i>       | Chr9       |
|                 | rs10488343                  | 1.100e-03 | <i>N/A</i>       | Chr7       |
|                 | s10505093                   | 2.800e-03 | <i>N/A</i>       | Chr8       |
| AntEpiSeeker    | rs3844556                   | 1.473e-06 | <i>PKD2L1</i>    | Chr10      |
|                 | rs10507949                  |           | <i>N/A</i>       | Chr13      |
|                 | rs10492225                  | 4.250e-05 | <i>N/A</i>       | Chr12      |
|                 | rs176880                    |           | <i>ZNF37A</i>    | Chr10      |
|                 | rs724820                    | 5.901e-05 | <i>C20orf133</i> | Chr20      |
|                 | rs2143881                   |           | <i>N/A</i>       | Chr6       |
|                 | <b>rs380390</b>             | 6.500e-05 | <i>CFH</i>       | Chr1       |
|                 | rs944838                    |           | <i>GPC6</i>      | Chr13      |
|                 | rs10484309                  | 9.678e-05 | <i>N/A</i>       | Chr6       |
|                 | rs10254116                  |           | <i>PTHB1</i>     | Chr7       |
| BEAM            | <b>rs380390</b>             | 1.752e-06 | <i>CFH</i>       | Chr1       |
|                 | <b>rs1329428</b>            | 3.643e-06 | <i>CFH</i>       | Chr1       |
| <i>epi</i> MODE | rs3743175                   | 7.398e-07 | <i>ZNF291</i>    | Chr15      |
|                 | <b>rs1394608</b>            |           | <i>SGCD</i>      | Chr1       |
|                 | rs3743175                   | 1.341e-05 | <i>ZNF291</i>    | Chr15      |
|                 | rs2828155                   |           | <i>N/A</i>       | Chr21      |
|                 | rs10507949                  |           | <i>N/A</i>       | Chr13      |
|                 | <b>rs1394608</b>            |           | <i>SGCD</i>      | Chr1       |
|                 | rs3886593                   | 3.698e-05 | <i>MSI2</i>      | Chr17      |
|                 | rs10491243                  |           | <i>N/A</i>       | Chr5       |
|                 | <b>rs1329428</b>            |           | <i>CFH</i>       | Chr1       |
|                 | <b>rs380390</b>             |           | <i>CFH</i>       | Chr1       |
| BOOST           | <b>rs380390</b>             | 1.752e-06 | <i>CFH</i>       | Chr1       |
|                 | <b>rs1329428</b>            | 3.643e-06 | <i>CFH</i>       | Chr1       |
|                 | rs3775652                   | 4.152e-05 | <i>INPP4B</i>    | Chr4       |
|                 | <b>rs1394608</b>            | 8.806e-05 | <i>SGCD</i>      | Chr1       |

|            |                  |              |       |
|------------|------------------|--------------|-------|
| rs1930022  | 2.194e-04        | <i>N/A</i>   | Chr9  |
| rs994542   | <b>5.068e-09</b> | <i>N/A</i>   | Chr6  |
| rs9298846  |                  | <i>N/A</i>   | Chr9  |
| rs2359907  | 1.242e-06        | <i>N/A</i>   | Chr1  |
| rs9326913  |                  | <i>N/A</i>   | Chr5  |
| rs2957935  | 1.627e-06        | <i>SKAP1</i> | Chr17 |
| rs10519745 |                  | <i>N/A</i>   | Chr5  |
| rs2386906  | 1.915e-05        | <i>N/A</i>   | Chr10 |
| rs9313446  |                  | <i>SLIT3</i> | Chr5  |
| rs293379   | 2.017e-05        | <i>ABHD2</i> | Chr15 |
| rs9313446  |                  | <i>SLIT3</i> | Chr5  |

## REFERENCES

1. Zhang Y, Liu JS: **Bayesian inference of epistatic interactions in case-control studies.** *Nature Genetics* 2007, **39**(9):1167-1173.
2. Shang J, Zhang J, Sun Y, Zhang Y: **EpiMiner: A three-stage co-information based method for detecting and visualizing epistatic interactions.** *Digital Signal Processing* 2014, **24**:1-13.
3. Wan X, Yang C, Yang Q, Xue H, Fan X, Tang NLS, Yu W: **BOOST: A fast approach to detecting gene-gene interactions in genome-wide case-control studies.** *American Journal of Human Genetics* 2010, **87**(3):325.
4. Wan X, Yang C, Yang Q, Xue H, Tang NL, Yu W: **Predictive rule inference for epistatic interaction detection in genome-wide association studies.** *Bioinformatics* 2010, **26**(1):30-37.
5. Wang Y, Liu X, Robbins K, Rekaya R: **AntEpiSeeker: detecting epistatic interactions for case-control studies using a two-stage ant colony optimization algorithm.** *BMC Research Notes* 2010, **3**(1):117.
6. Tang W, Wu X, Jiang R, Li Y: **Epistatic module detection for case-control studies: a Bayesian model with a Gibbs sampling strategy.** *PLoS genetics* 2009, **5**(5):e1000464.
7. Shang J, Zhang J, Sun Y, Liu D, Ye D, Yin Y: **Performance analysis of novel methods for detecting epistasis.** *BMC Bioinformatics* 2011, **12**(1):475.
8. Shang J, Zhang J, Lei X, Zhang Y, Chen B: **Incorporating heuristic information into ant colony optimization for epistasis detection.** *Genes & Genomics* 2012, **34**(3):321-327.
9. Aflakparast M, Salimi H, Gerami A, Dub éM, Visweswaran S, Masoudi-Nejad A: **Cuckoo search epistasis: a new method for exploring significant genetic interactions.** *Heredity* 2014, **112**(6):666-674.
